# Supplementary material for: Progeroid laminopathy with restrictive dermopathy-like features caused by an isodisomic LMNA mutation p.R435C
Source: PubMed Central journal article supplement (PMC3824411; doi:10.18632/aging.100566), 2013-06-19
Supplement: aging-05-445-s001.pdf [file aging-05-445-s001.pdf]

**SUPPLEMENTAL TABLES**

**Table S1. Primer sequences and annealing temperatures for genomic amplification of *LMNA* and *FACE1* exons**

| Exon             | Orientation | Primer sequence (5'-3') | Amplicon size (bp) | Annealing temperature (°C) |
|------------------|-------------|-------------------------|--------------------|----------------------------|
| <i>LMNA</i> E1a  | Forward     | GGGACTGCCCTTTAAGAGT     | 500                | 62                         |
|                  | Reverse     | GACCACCTCTTCAGACTCGG    |                    |                            |
| <i>LMNA</i> E1b  | Forward     | ACATCGACCGTGTGCGCTC     | 268                | 62                         |
|                  | Reverse     | CCTCTCCACTCCCCGCCA      |                    |                            |
| <i>LMNA</i> E2   | Forward     | GATGCCCTCTCCTGGTAAT     | 399                | 60                         |
|                  | Reverse     | GCTCTGAAATCAGGTGACAGG   |                    |                            |
| <i>LMNA</i> E3   | Forward     | TTCTTGTTCTGTGACCCCTT    | 232                | 60                         |
|                  | Reverse     | CCCAAGTCTGTCATCACCCA    |                    |                            |
| <i>LMNA</i> E4   | Forward     | TAAAGTGGGGCTGGTAGTGG    | 319                | 62                         |
|                  | Reverse     | GTGAGGGAACCAATCGAGAG    |                    |                            |
| <i>LMNA</i> E5   | Forward     | CCTCCACCCCTCCCAGTCAC    | 231                | 62                         |
|                  | Reverse     | TGCATCCGCCCCAGACTCTA    |                    |                            |
| <i>LMNA</i> E6   | Forward     | CAAACCCTCCCACCCCCC      | 299                | 62                         |
|                  | Reverse     | CCAGTTGCCGGGCCAGAG      |                    |                            |
| <i>LMNA</i> E7   | Forward     | CCCCACTGGTCTCCCTCTCC    | 292                | 62                         |
|                  | Reverse     | CCCTGATGCAGCTGTATCCCC   |                    |                            |
| <i>LMNA</i> E8   | Forward     | TGGGCCTTTGAGCAAGATAC    | 257                | 60                         |
|                  | Reverse     | GAAAAGGACACTTACCCAGC    |                    |                            |
| <i>LMNA</i> E9   | Forward     | CAGGTGGTGACGGTGAGTG     | 285                | 62                         |
|                  | Reverse     | CAGCTGGCTCCGATGTTG      |                    |                            |
| <i>LMNA</i> E10  | Forward     | GCCACAAGAAAAGTTGCAGG    | 320                | 62                         |
|                  | Reverse     | CAGGCCAGCGAGTAAAGTTC    |                    |                            |
| <i>LMNA</i> E11  | Forward     | TGGTCAGTCCCAGACTCGCC    | 358                | 60                         |
|                  | Reverse     | CGCCTGCAGGATTTGGAGA     |                    |                            |
| <i>LMNA</i> E12  | Forward     | TGAGGGATGGGGGAGATGCT    | 196                | 62                         |
|                  | Reverse     | GGGTGGGCATGAGGTGAGGA    |                    |                            |
| <i>FACE1</i> E1  | Forward     | GGGCTGGGGCTTTTCTGTAG    | 472                | 55                         |
|                  | Reverse     | GGACCACAAAGACGAGACTGG   |                    |                            |
| <i>FACE1</i> E2  | Forward     | TGGCAAGCTATAAACCATTCTG  | 289                | 55                         |
|                  | Reverse     | GAAAATGAAAACAACCAGAC    |                    |                            |
| <i>FACE1</i> E3  | Forward     | CCGTACTGGCCTCTTTTGTT    | 273                | 55                         |
|                  | Reverse     | GAAAGCCTGCCAAGCTAAAA    |                    |                            |
| <i>FACE1</i> E4  | Forward     | TTGATTTGTTTGCCAGTAGTTCA | 235                | 55                         |
|                  | Reverse     | CAGGACAAAAGCACAGAAGTTTT |                    |                            |
| <i>FACE1</i> E5  | Forward     | CCAGTTTCTCAGTTTCTTGTGG  | 244                | 55                         |
|                  | Reverse     | TCTACCAAGGAACTTTTGC     |                    |                            |
| <i>FACE1</i> E6  | Forward     | GGGCCTGGGAATACCAGAGCAAG | 490                | 55                         |
|                  | Reverse     | AGCCACCAGTTTCTATCCCTGGC |                    |                            |
| <i>FACE1</i> E7  | Forward     | CTCCAAAGGACCCCAAACCTT   | 310                | 55                         |
|                  | Reverse     | TTTTGAGTTGTACAGGAACTG   |                    |                            |
| <i>FACE1</i> E8  | Forward     | AATCTATGAAGGGCTATTACTG  | 278                | 55                         |
|                  | Reverse     | CTTGGCCTCTTATATGAC      |                    |                            |
| <i>FACE1</i> E9  | Forward     | TGATCCCATAGTGAAATCAGCTT | 256                | 55                         |
|                  | Reverse     | GATTTGAAGCAGGCAAGAGC    |                    |                            |
| <i>FACE1</i> E10 | Forward     | TACAGTCTCAGCTCATGGAAC   | 357                | 55                         |
|                  | Reverse     | TGCTGCCAGGACAGAAATAA    |                    |                            |

**Table S2. Primer sequences of microsatellite markers used for the analysis of uniparental disomy on chromosome 1**

| Marker  | Position | Orientation | Primer sequence (5'-3') | Annealing temperature (°C) |
|---------|----------|-------------|-------------------------|----------------------------|
| D1S2660 | 1p36     | Forward     | CACACATGCACATGCAC       | 50                         |
|         |          | Reverse     | AGTGACACCAGCAGGG        |                            |
| D1S2652 | 1p32     | Forward     | GCAGGTGTGATGCCAGG       | 50                         |
|         |          | Reverse     | TACGGCTGATTGGGAGAAC     |                            |
| D1S500  | 1p31     | Forward     | GTAATGTCACTGGCATGGA     | 50                         |
|         |          | Reverse     | CTCTGATACGCCAAGTGCT     |                            |
| D1S2726 | 1p13     | Forward     | CCACAAGTTGCAGGGTT       | 50                         |
|         |          | Reverse     | CTGGATGGATGCTCAAATAC    |                            |
| D1S498  | 1q21.3   | Forward     | TTGCTGAAGGGACATAGTG     | 50                         |
|         |          | Reverse     | TGCTGGGTTATATCCAATATC   |                            |
| D1S3020 | 1q21.3   | Forward     | TGGTGTTTGGTTACATGGAT    | 50                         |
|         |          | Reverse     | GTGAAGGCAACATGTATCGT    |                            |
| D1S305  | 1q21.3   | Forward     | CCAGNCTCGGTATGTTTTTACTA | 50                         |
|         |          | Reverse     | CTGAAACCTCTGTCCAAGCC    |                            |
| D1S2140 | 1q22     | Forward     | GCTGAAAAGACACTTCAGTGG   | 50                         |
|         |          | Reverse     | ATGGTATGAACCTGGAGGTG    |                            |
| D1S1653 | 1q23.1   | Forward     | GGAAAGCCTGTAGGAAGAGG    | 50                         |
|         |          | Reverse     | CCTGGATGACAGAGTGCTCT    |                            |
| D1S2369 | 1q23.1   | Forward     | ACATCCATCCTTAATATTTTGGC | 50                         |
|         |          | Reverse     | GCATTTCTGACACTCATGACTTG |                            |
| D1S484  | 1q23.3   | Forward     | AGTGATGAGGGCCTCTATTT    | 50                         |
|         |          | Reverse     | AGCTTCTGCCAACTATGTGC    |                            |
| D1S210  | 1q24     | Forward     | CCTCAGTTCATTCCCCATAA    | 50                         |
|         |          | Reverse     | AGCTGAATCTCACCCAATAACTA |                            |
| D1S249  | 1q32     | Forward     | TGGCATGTCTTTGAAGGAAT    | 50                         |
|         |          | Reverse     | TGGTTGTAGATGAGACTGGC    |                            |
| D1S423  | 1q44     | Forward     | GGGCAACAAGAATGAAACTC    | 50                         |
|         |          | Reverse     | GGCCTAAGATTGCTGTGAAG    |                            |

**SUPPLEMENTAL FIGURES**

| Change              |                | Exon     | Reference (Ensembl) | Frequency (Reference population) |
|---------------------|----------------|----------|---------------------|----------------------------------|
| cDNA                | Amino Acid     |          |                     |                                  |
| c.861T>C            | p.A287A        | 5        | rs17847240          | 16%                              |
| c.1157+16G>A        | ---            | 6        | rs57888699          | 16%                              |
| <b>c.1303C&gt;T</b> | <b>p.R435C</b> | <b>7</b> | <b>rs150840924</b>  | <b>0,023%</b>                    |
| c.1338T>C           | p.D446D        | 7        | rs17847243          | 21%                              |
| c.1489-41C>T        | ---            | 8/9      | rs17847245          | 15%                              |

**Supplementary Figure S1.** DNA changes found by Sanger sequencing of the coding region of the *LMNA* gene (ENSG00000160789, ENST00000368300), rs numbers and frequencies of the changes found in a European reference population (<http://ensembl.genomics.org.cn:8058/index.html>).

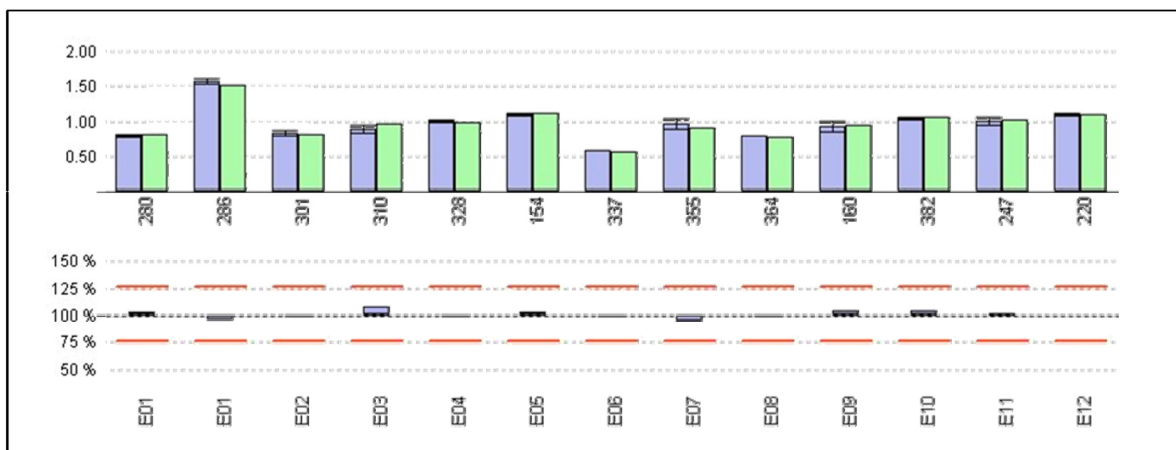

**Supplementary Figure S2.** Multiplex Ligation-dependent Probe Amplification (MLPA) analysis for the *LMNA* gene performed on DNA of the index patient. There are two copies for all 12 exons of the *LMNA* gene.

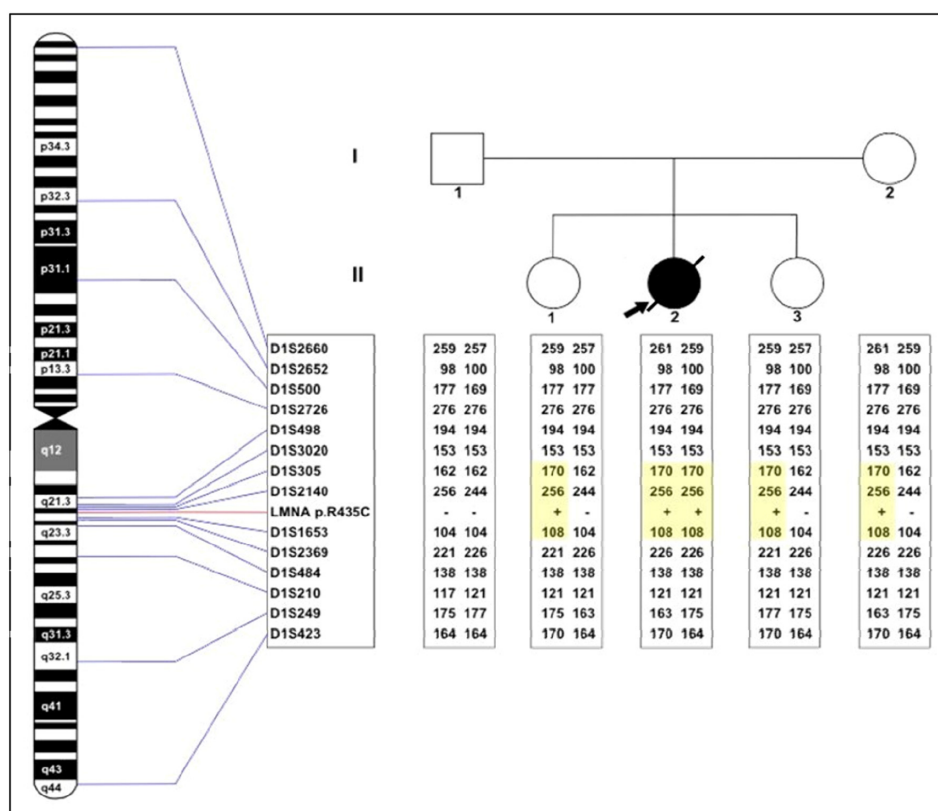

**Supplementary Figure S3.** Microsatellite marker analysis on chromosome 1 showing the position of the chosen markers and their length in base pairs for the index patient, both parents and both siblings. The mutant *LMNA* allele is marked as +, the wild type allele as -. The region marked in yellow is evident for uniparental disomy.

**prelamin A staining**

WT-LMNA      R435C-LMNA

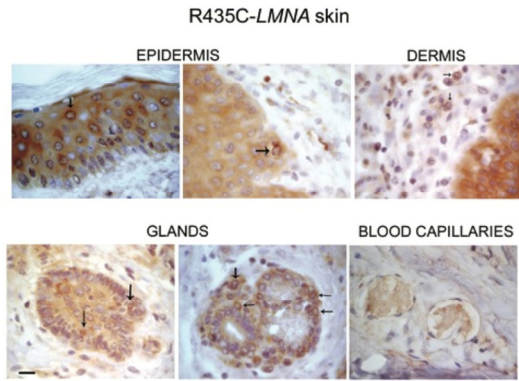

**Supplementary Figure S4.** Prelamin A-staining of skin samples taken at age of 11 months. Only a few nuclei in the patient's skin were positive for prelamin A. This is confirming that the processing of prelamin A is not affected.
